# Supplementary material for: TGFβ3-mediated induction of Periostin facilitates head and neck cancer growth and is associated with metastasis
Source: PubMed Central journal article supplement (PMC4746667; doi:10.1038/srep20587), 2016-02-09
Supplement: srep20587-s1.pdf [file srep20587-s1.pdf]

# TGFβ3-mediated induction of Periostin facilitates head and neck cancer growth and is associated with metastasis

Xing Qin<sup>1,2#</sup>, Ming Yan<sup>1,2#</sup>, Jianjun Zhang<sup>1,2</sup>, Xu Wang<sup>1,2</sup>, Zongze Shen<sup>1,2</sup>,  
Zhongjing Lv<sup>1,2</sup>, Zhihui Li<sup>1,2</sup>, Wenyi Wei<sup>1,3</sup> and Wantao Chen<sup>1,2\*</sup>

## Supplementary files

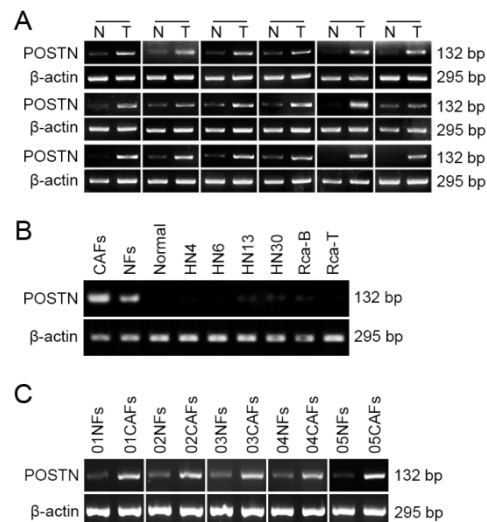

**Supplementary Figure S1. The mRNA levels of POSTN in different HNC associated samples.** (A) Representative results of POSTN mRNA levels from 18 pairs of HNC tissues and their paired adjacent normal tissues. (B) The translational statuses of POSTN were determined in CAFs and NFs, 6 representative HNC cell lines and normal oral epithelial cells (titled normal) using semi-quantitative RT-PCR. (C) POSTN mRNA levels in 5 pairs of NFs and CAFs were measured by semi-quantitative RT-PCR.

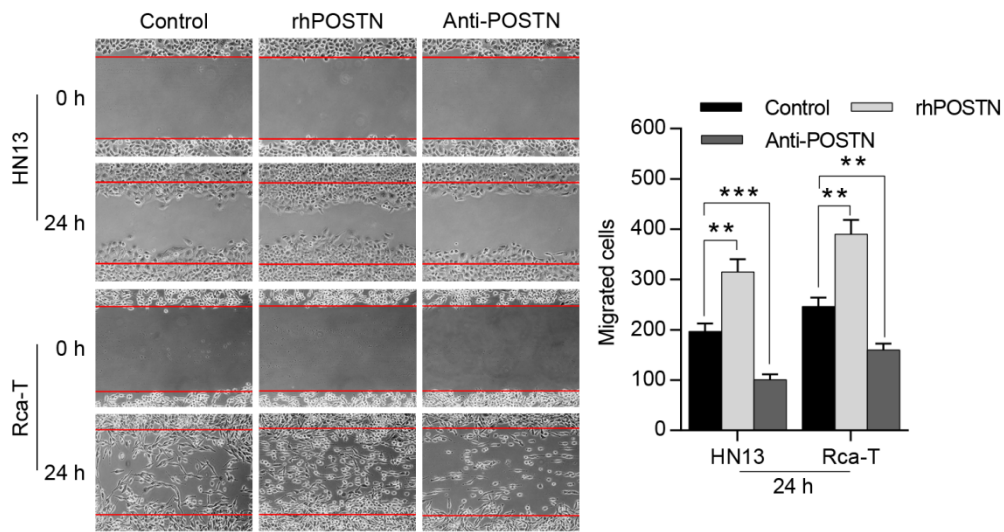

**Supplementary Figure S2.** Recombinant human POSTN (100 ng/mL) promoted the migration of HNC cells (HN13 and Rca-T), while neutralization of POSTN inhibited the migration of HNC cells (HN13 and Rca-T).

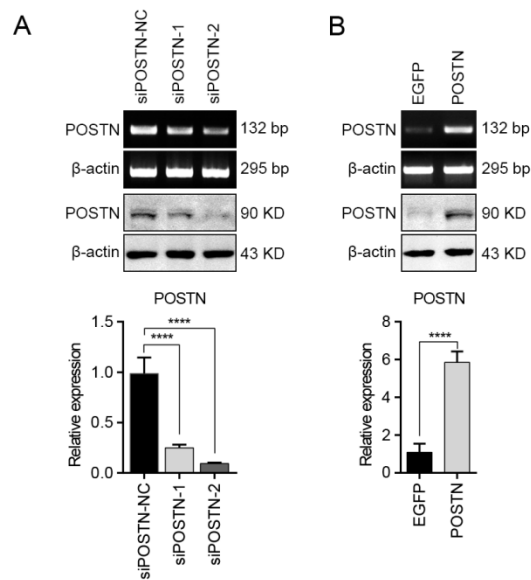

**Supplementary Figure S3. POSTN expression in fibroblasts after POSTN knockdown or overexpression.** (A) The results of semi-quantitative RT-PCR,

western blot analysis and real-time PCR showing POSTN expression levels in CAFs after transfection of siRNA targeting POSTN. (B) The results of semi-quantitative RT-PCR, western blot analysis and real-time PCR showing POSTN expression levels in NFs after POSTN expression vector (POSTN) transfection. \*\*\* $p < 0.0001$ .

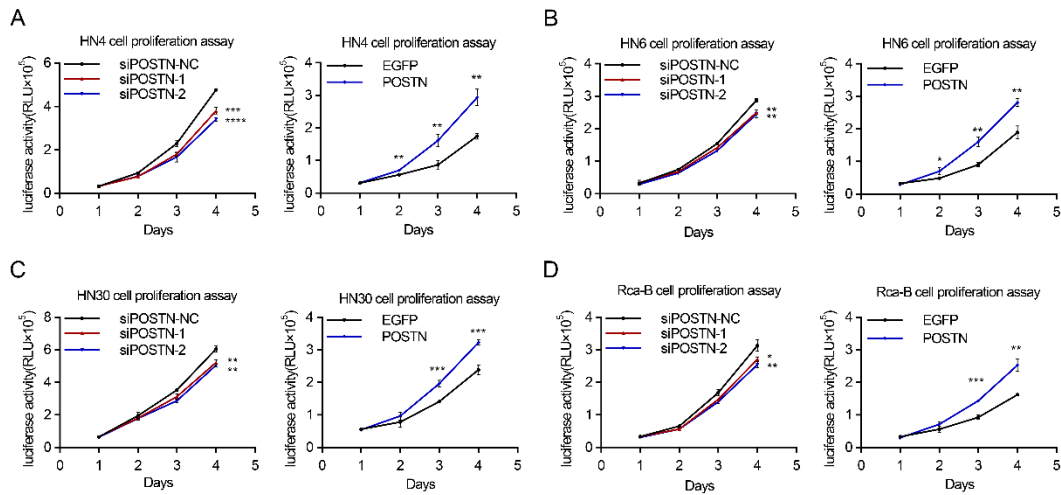

**Supplementary Figure S4. Functional analysis of POSTN effects on HNC cell proliferation.** (A-D) POSTN knockdown in CAFs partially inhibited the growth of HNC cells (HN4, HN6, HN30 and Rca-B), while POSTN overexpression in NFs facilitated the proliferation of HNC cells (HN4, HN6, HN30 and Rca-B). \*  $p < 0.05$ ; \*\*  $p < 0.01$ ; \*\*\*  $p < 0.001$ ; \*\*\*\*  $p < 0.0001$ .

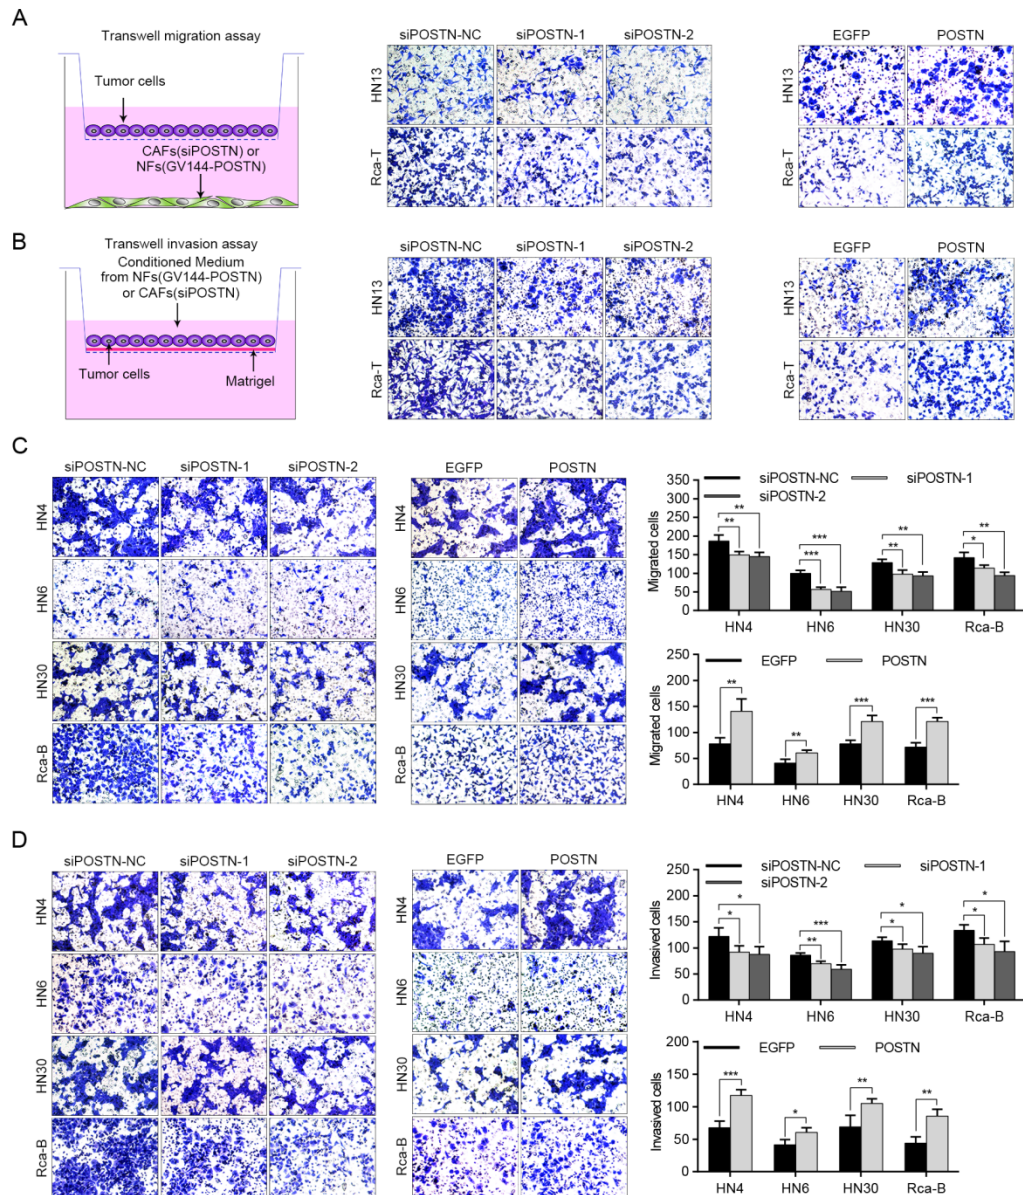

**Supplementary Figure S5. Functional analysis of POSTN effects on HNC cell migration and invasion.** (A, B) Models illustrating the methods of transwell migration and invasion assay. POSTN knockdown in CAFs inhibited the migratory and invasive abilities of HN13 and Rca-T cells. POSTN overexpression in NFs increased the migration and invasion of HN13 and Rca-T cells. (C, D) POSTN knockdown in CAFs inhibited the migratory and invasive abilities of HNC cells (HN4,

HN6, HN30 and Rca-B), while POSTN overexpression in NFs increased the migration and invasion of HNC cells (HN4, HN6, HN30 and Rca-B). \*  $p < 0.05$ ; \*\*  $p < 0.01$ ; \*\*\*  $p < 0.001$ .

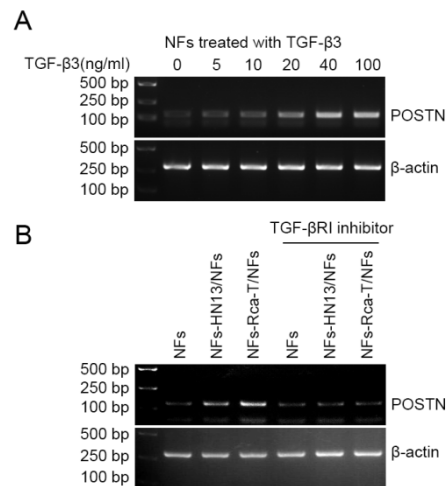

**Supplementary Figure S6. TGF- $\beta$ 3 induced POSTN expression in NFs.** (A) TGF- $\beta$ 3 induced POSTN expression in NFs in a dose-dependent manner and the mRNA expression by semi-quantitative RT-PCR were measured at the indicated concentrations. (B) Blocking of TGF- $\beta$ 3 with the inhibition of type I TGF- $\beta$  receptor (SB431542, 10  $\mu$ M) abrogated the induced-POSTN expression in NFs after the co-culture of NFs and HNC cells. POSTN mRNA levels were determined in NFs using semi-quantitative RT-PCR.

**Supplementary Table S1. The primers used for real-time PCR and semi-quantitative RT-PCR analyses.**

| <b>Genes</b>         | <b>Primer sequences</b>                   |
|----------------------|-------------------------------------------|
| Human POSTN          | forward 5'-GCACTCTGGGCATCGTGGGA -3'       |
|                      | reverse 5'-AATCCAAGTTGTCCCAAGCC -3'       |
| Human SPP1           | forward 5'-GAAGTTTCGCAGACCTGACAT -3'      |
|                      | reverse 5'-GTATGCACCATTCAACTCCTCG -3'     |
| Human TGF- $\beta$ 1 | forward 5'-TCGCCAGAGTGGTTATCTTTTG -3'     |
|                      | reverse 5'-AGGAGCAGTGGGCGCTAAG -3'        |
| HumanTGF- $\beta$ 2  | forward 5'- ATCCCGCCCACTTTCTAC -3'        |
|                      | reverse 5'-GCTCAATCCGTTGTTTCAGG -3'       |
| HumanTGF- $\beta$ 3  | forward 5'-GCCCTTGCCCATACCTCCGC-3'        |
|                      | reverse 5'-CGCAGCAAGGCGAGGCAGAT -3'       |
| Human IL-4           | forward 5'- ACATTGTCACTGCAAATCGACACC -3'  |
|                      | reverse 5'- TGTCTGTTACGGTCAACTCGGTGC -3'  |
| Human IL-13          | forward 5'- GCAATGGCAGCATGGTATGG -3'      |
|                      | reverse 5'- AAGGAATTTTACCCCTCCCTAACC -3'  |
| Human BMP2           | forward 5'- ACTCGAAATTCCCCGTGACC -3'      |
|                      | reverse 5'- CCACTTCCACCACGAATCCA -3'      |
| Human PDGF-bb        | forward 5'- CAGCGCCCATTTTTTCATTCC -3'     |
|                      | reverse 5'-GTTTTCTCTTTGCAGCGAGGC-3'       |
| Human $\beta$ -actin | forward 5'- TCACCCACACTGTGCCCATCTACGA -3' |
|                      | reverse 5'- CAGCGGAACCGCTCATTGCCAATGG -3' |
| Rat POSTN            | forward 5'-ATCTTCCTCAGCCTCCTC -3'         |
|                      | reverse 5'-CCCAATCAGAATCTCCCT -3'         |
| Rat TGF- $\beta$ 1   | forward 5'- AATTCCTGGCGTTACCTTGGT -3'     |
|                      | reverse 5'- GAAGGGTCGGTTCATGTATG -3'      |

|                    |                                         |
|--------------------|-----------------------------------------|
| Rat TGF- $\beta$ 2 | forward 5'- TGCCATCCCGCCCACTTTCTAC -3'  |
|                    | reverse 5'- CAATCCGTTGTTTCAGCCACTCT -3' |
| Rat TGF- $\beta$ 3 | forward 5'- CACAGTCCGCTACTTCGTC -3'     |
|                    | reverse 5'- CCCTAATGGCTTCCACCCTC -3'    |
| Rat IL-4           | forward 5'-CCACGGAGAACGAGCTCATC -3'     |
|                    | reverse 5'-ACCGAGAACCCCACTTGTT -3'      |
| Rat IL-13          | forward 5'-CTCGCTTGCCTTGGTG -3'         |
|                    | reverse 5'-TGATGTTGCTCAGCTCCTC -3'      |
| Rat BMP2           | forward 5'-CCTATATGCTCGACCTGTAC -3'     |
|                    | reverse 5'-CCCACTCATTCTGAAAGTTC -3'     |
| Rat PDGF-bb        | forward 5'- GGAGCTTCACAGAGGACTGG -3'    |
|                    | reverse 5'-GATCTGGGTGCCATGAGAGT -3'     |
| Rat $\beta$ -actin | forward 5'-ACGTTGACATCCGTAAAGACC -3'    |
|                    | reverse 5'-AACGCAGCTCAGTAACAGTCC -3'    |
